# Supplementary material for: Risk Factors and COVID-19 Survival Among Cancer Survivors in New Jersey: A Population-based study
Source: Research Square preprint supplement (doi:10.21203/rs.3.rs-7483142/v1), 2025-10-12
Supplement: Supplementary file 1 [file 13591c951f9dec9375b19648.docx]

**Supplementary materials**

| **Table A.** Cumulative Incidence Rate (%) of COVID-19-Specific Death by Sex, Race, and Ethnicity   | **Variable** | **0.5 months** | **1 month** | **36 months** | **p-value**1 | | --- | --- | --- | --- | --- | | **Sex** |  |  |  | <0.001 | | Male | 4.8% (4.5%, 5.0%) | 7.6% (7.3%, 7.9%) | 9.9% (9.6%, 10%) |  | | Female | 2.8% (2.6%, 3.0%) | 4.3% (4.1%, 4.5%) | 5.8% (5.5%, 6.0%) |  | | **Race** |  |  |  | <0.001 | | White | 3.6% (3.5%, 3.8%) | 5.6% (5.4%, 5.8%) | 7.5% (7.3%, 7.8%) |  | | Black | 4.6% (4.2%, 5.1%) | 7.4% (6.9%, 8.0%) | 9.3% (8.7%, 10%) |  | | API | 3.1% (2.4%, 3.9%) | 5.0% (4.1%, 6.0%) | 7.3% (6.2%, 8.5%) |  | | Other | 1.4% (0.68%, 2.5%) | 3.4% (2.2%, 5.0%) | 4.3% (2.9%, 6.1%) |  | | Unknown | 0.22% (0.02%, 1.2%) | 0.22% (0.02%, 1.2%) | 0.45% (0.09%, 1.5%) |  | | **Ethnicity** |  |  |  | <0.001 | | Non-Hispanic | 3.8% (3.7%, 4.0%) | 5.9% (5.7%, 6.1%) | 7.9% (7.6%, 8.1%) |  | | Hispanic | 3.0% (2.7%, 3.4%) | 4.9% (4.5%, 5.3%) | 6.6% (6.1%, 7.1%) |  | | **Stage** |  |  |  | <0.001 | | In situ | 2.6% (2.3%, 3.0%) | 4.4% (4.0%, 4.9%) | 5.9% (5.4%, 6.4%) |  | | Localized | 3.8% (3.6%, 4.0%) | 5.8% (5.5%, 6.0%) | 7.6% (7.3%, 7.9%) |  | | Regional | 3.1% (2.8%, 3.4%) | 5.0% (4.6%, 5.4%) | 6.5% (6.1%, 7.0%) |  | | Distant | 5.0% (4.5%, 5.5%) | 7.8% (7.2%, 8.4%) | 11% (10%, 11%) |  | | Unknown/Unstaged | 4.5% (3.8%, 5.2%) | 7.4% (6.5%, 8.3%) | 9.6% (8.7%, 11%) |  | | **Blood cancer** |  |  |  | <0.001 | | Solid | 3.7% (3.5%, 3.9%) | 5.7% (5.5%, 5.9%) | 7.5% (7.2%, 7.7%) |  | | Blood/Hematopoietic | 3.7% (3.3%, 4.2%) | 6.3% (5.7%, 6.9%) | 9.4% (8.6%, 10%) |  | | 1Gray's Test | | | | | |
| --- | --- | --- | --- | --- | --- | --- | --- | --- | --- | --- | --- | --- | --- | --- | --- | --- | --- | --- | --- | --- | --- | --- | --- | --- | --- | --- | --- | --- | --- | --- | --- | --- | --- | --- | --- | --- | --- | --- | --- | --- | --- | --- | --- | --- | --- | --- | --- | --- | --- | --- | --- | --- | --- | --- | --- | --- | --- | --- | --- | --- | --- | --- | --- | --- | --- | --- | --- | --- | --- | --- | --- | --- | --- | --- | --- | --- | --- | --- | --- | --- | --- | --- | --- | --- | --- | --- | --- | --- | --- | --- | --- | --- | --- | --- | --- | --- | --- | --- | --- | --- | --- | --- | --- | --- | --- | --- | --- | --- | --- | --- | --- | --- | --- | --- | --- |

**Table B.** Cumulative Incidence Rate of Cancer-Specific Death by Sex, Race, and Ethnicity

| **Variable** | **0.5 months** | **1 month** | **36 months** | **p-value**1 |
| --- | --- | --- | --- | --- |
| **Sex** |  |  |  | 0.001 |
| Male | 0.34% (0.28%, 0.41%) | 0.61% (0.52%, 0.70%) | 8.9% (8.0%, 9.9%) |  |
| Female | 0.27% (0.22%, 0.33%) | 0.50% (0.43%, 0.58%) | 8.6% (7.7%, 9.7%) |  |
| **Race** |  |  |  | <0.001 |
| White | 0.28% (0.24%, 0.33%) | 0.53% (0.47%, 0.60%) | 8.8% (8.0%, 9.6%) |  |
| Black | 0.47% (0.34%, 0.63%) | 0.70% (0.54%, 0.90%) | 9.3% (7.7%, 11%) |  |
| API | 0.15% (0.04%, 0.43%) | 0.51% (0.27%, 0.92%) | 9.2% (6.2%, 13%) |  |
| Other | 0.14% (0.01%, 0.77%) | 0.30% (0.06%, 1.0%) | 5.3% (3.0%, 8.6%) |  |
| Unknown | 0.22% (0.02%, 1.2%) | 0.22% (0.02%, 1.2%) | 0.93% (0.31%,2.2%) |  |
| **Ethnicity** |  |  |  | 0.5 |
| Non-Hispanic | 0.31% (0.27%, 0.36%) | 0.56% (0.50%, 0.62%) | 8.8% (8.1%, 9.6%) |  |
| Hispanic | 0.23% (0.15%, 0.35%) | 0.51% (0.38%, 0.68%) | 8.6% (7.0%, 10%) |  |
| **Stage** |  |  |  | <0.001 |
| In situ | 0.08% (0.03%, 0.16%) | 0.16% (0.09%, 0.28%) | 4.3% (2.7%, 6.5%) |  |
| Localized | 0.16% (0.12%, 0.20%) | 0.29% (0.24%, 0.35%) | 5.6% (4.7%, 6.5%) |  |
| Regional | 0.31% (0.22%, 0.43%) | 0.70% (0.56%, 0.88%) | 12% (10%, 14%) |  |
| Distant | 1.1% (0.83%, 1.3%) | 1.8% (1.5%, 2.2%) | 22% (20%, 24%) |  |
| Unknown/ Unstaged | 0.56% (0.35%, 0.86%) | 0.80% (0.54%, 1.2%) | 10% (6.6%, 15%) |  |
| **Blood cancer** |  |  |  | 0.8 |
| Solid | 0.30% (0.26%, 0.35%) | 0.55% (0.49%, 0.61%) | 8.7% (8.0%, 9.5%) |  |
| Blood/Hematopoietic | 0.27% (0.16%, 0.43%) | 0.58% (0.41%, 0.80%) | 9.2% (7.3%, 11%) |  |
| 1Gray's Test | | | | |
